# Plant PhysioSpace: a robust tool to compare stress response across plant species

Ali Hadizadeh Esfahani<sup>1</sup>, Janina Maß<sup>2</sup>, Asis Hallab<sup>2</sup>, Bernhard M. Schuldt<sup>3</sup>,  
David Nevarez<sup>1</sup>, Björn Usadel<sup>2</sup>, Mark-Christoph Ott<sup>4</sup>, Benjamin Buer<sup>4</sup>,  
Andreas Schuppert<sup>1\*</sup>

<sup>1</sup>Joint Research Center for Computational Biomedicine, RWTH Aachen University,  
Aachen, Germany

<sup>2</sup>IBG-4: Bioinformatics, Forschungszentrum Jülich, 52425 Jülich, Germany

<sup>3</sup>Independent Consultant

<sup>4</sup>Bayer AG, Crop Science Division, Monheim am Rhein, Germany

## Abstract

Generalization of transcriptomics results can be achieved by comparison across experiments, which is based on integration of interrelated transcriptomics studies into a compendium. Both characterization of the fate of the organism under study as well as distinguishing between generic and specific responses can be gained in such a broader context. We have built such a compendium for plant stress response, which is based on integrating publicly available data sets for plant stress response to generalize results across studies and extract the most robust and meaningful information possible from them.

There are numerous methods and tools to analyze such data sets, most focusing on gene-wise dimension reduction of data to obtain marker genes and gene sets, e.g. for pathway analysis. Relying only on isolated biological modules might lead to missing of important confounders and relevant context. Therefore, we have chosen a different approach: Our novel tool, which we called Plant PhysioSpace, provides the ability to compute experimental conditions across species and platforms without a priori reducing the reference information to specific gene-sets. It extracts physiologically relevant signatures from a reference data set, a collection of public data sets, by integrating and transforming heterogeneous reference gene expression data into a set of physiology-specific patterns, called PhysioSpace. New experimental data can be mapped to these PhysioSpaces, resulting in similarity scores, providing quantitative similarity of the new experiment to an a priori compendium.

Here we report the implementation of two R packages, one software and one data package, and a shiny web application, which provides plant biologists convenient ways to access the method and a precomputed compendium of more than 900 PhysioSpace basis vectors from 4 different species (*Arabidopsis thaliana*, *Oryza sativa*, *Glycine max*, and *Triticum aestivum*).

The tool reduces the dimensionality of data sample-wise (and not gene-wise), which results in a vector containing all genes. This method is very robust against noise and change of platform while still being sensitive. Plant PhysioSpace can therefore be used as an inter-species or cross-platform similarity measure. We demonstrate that Plant PhysioSpace can successfully translate stress responses between different species and platforms (including single cell technologies).

**Keywords**— crop science, stress analysis, single cell, computational method, web-tool

## 1 Introduction

As a consequence of their non-motile nature, plants developed a peculiarly organized yet labyrinthine response system to external biotic and abiotic stresses. Exploiting this complex system has been playing an important role in achieving sustainable plant protection in agriculture. Instances of tweaking the plant defense system for obtaining better crops are numerous. For instance, priming, i.e. promoting plants to a primed state of defense, has been known, investigated and utilized for decades if not centuries [1, 2]. By exposure to biotic stresses (e.g. microbe-, pathogen-, herbivore-associated molecular patterns) or abiotic stresses (for instance harsh temperatures, drought or damage-associated molecular patterns), plants switch

\*Correspondence: Schuppert@combine.rwth-aachen.de

49 to a primed reinforced defense state. In this primed state, they can display sharper stress response, which  
50 in turn results in more robust and resilient organisms. By artificially exposing plants to biotic and abiotic  
51 stresses directly, or to some natural or synthetic chemicals which provoke the same defense response, it is  
52 possible to engineer tougher plants [3]. Another example of crop engineering is by genetically modifying  
53 (GM) plants to attain higher tolerance to stress [4]. Introducing a single gene encoding C-5 sterol desat-  
54 urase (FvC5SD) from *Collybia velutipes* to tomato is an instance of GM crop research, and it brings about  
55 a drought-tolerant and fungal resistant crop [5, 6]. Obtaining resistance to papaya ringspot virus (PRSV)  
56 in transgenic papaya is another famous example. The resistant papaya gains the protection by expressing  
57 the PRSV coat protein transgene [7].

58 In research experiments aiming to modify the plant’s defense system, such as the examples mentioned  
59 above, the stress responses of plants under study are to be thoroughly examined and contrasted to wild  
60 types. We argue that a tool, which is capable of quantitatively and dependably measuring the speed and  
61 intensity of stress responses in plants, can be of great assistance in this field of research. Hence, we present  
62 Plant PhysioSpace, an advanced computational tool based on PhysioSpace [8], for quantitative analysis of  
63 stress responses in plants.

64 Sequencing technologies are commonly used for studying the changes in the plants under examination.  
65 However, analysis of the results mostly focuses on gene-wise dimension reduction of data to obtain a list of  
66 genes, with the rest of the analysis pipeline fixating on the genes in the list. By design, Plant PhysioSpace  
67 extracts physiologically relevant information out of intricately convoluted gene expression data without  
68 reducing dimensions, providing a direct link from sequencing data to physiological processes. Since it is  
69 computationally cheap, the tool is able to train on a vast amount of retrospectively available data, allowing  
70 explicit integration of established knowledge and data, eventuating in robust results when testing the method  
71 on small data sets generated in specific experiments.

72 Plant PhysioSpace comprises two compartments: the space generation, the algorithm which elicits in-  
73 formation from big data, and the physio-mapping, the process with which new data can be analyzed by  
74 comparison to the extracted information (Fig.1). Compared to the machine learning nomenclature, space  
75 generation is analogous to *training* and physio-mapping to *testing*.

76 In this study, we focused on the application of our novel method in stress response analysis. As one of  
77 the fiercest adversaries of plants, biotic and abiotic stresses take a toll on commercial agriculture. Plant  
78 PhysioSpace can aid in engineering impervious crops, by quantitatively analyzing the effect of a new mutation  
79 or treatment on plant’s resistance.

80 Another long-lasting question in the field of stress response research is the potential heterogeneity in  
81 response among cell types under the stress. Generally, sequencing is done on thousands to millions of cells,  
82 revealing only the average effect on the bulk tissue, thus lacking the direct assessment of cells. The individual  
83 and unique role of cell types shape the function of their parent tissue. Hence, by careful examination of  
84 stressed tissue cells, the difference between their behavior, and the in-between interplay among them, one  
85 can gain new insights into the complex mechanisms shaping the plant stress response.

86 Since 2009, more and more single cell data sets are becoming available publicly. As with other new  
87 technologies, the focus is mainly on human and animal tissue sequencing. Lack of data availability is espe-  
88 cially true for plant studies on account of processing tissues with cell walls has been a bothersome obstacle  
89 for single cell technologies, as they mostly result in low capture rates. But recent leaps in single cell se-  
90 quencing technologies, e.g. the 10X platform, increased the resolution of single cell data, eventuating in a  
91 few plant single cell experiments [9, 10, 11, 12, 13]. Mostly, scRNA-seq studies follow the same analysis  
92 pipeline [14, 15]. In a nutshell, the highest variable genes are selected and gone through principal com-  
93 ponent analysis (PCA) and t-distributed stochastic neighborhood embedding (tSNE) or uniform manifold  
94 approximation and projection (UMAP) to demonstrate the underlying structure. Subsequently, Clustering  
95 or regression algorithms are used to identify biologically relevant groups (e.g. groups of cells with a similar  
96 response), or trends (e.g. pseudotemporal axis of cell development), from the underlying data structure [16].  
97 Although such technologies as 10X made plant single cell sequencing possible, they are far from perfect. For  
98 instance, compared to bulk sequencing technologies, technical noise has a higher interference on single cell  
99 reads, which calls for developing sophisticated bioinformatic analysis tools to handle those interferences.

100 This paper has been organized in the following way: It begins with a brief explanation of the Plant Phys-  
101 ioSpace algorithm, which includes a review of the already published method, plus the modifications adapting  
102 the method to the field of plant stress research. The paper will then go on to the benchmarking section,  
103 in which the method’s performance is assessed in translating stress response among different experiments,  
104 platforms, and species. Benchmarking is followed by two application showcases, in which we demonstrate  
105 two Plant PhysioSpace use-cases: investigating time-series data from biotic-stressed wheat, and analyzing a  
106 heat-stressed single cell data set. Finally, the discussion gives a brief summary and critique of the findings.

## 107 2 Method

### 108 2.1 Data Preparation

109 While setting up a PhysioSpace matrix, our method requires extensive training data for achieving adequate  
110 robustness. This training data can be retrieved from retrospective data sets. To that end, we curated more

111 than 4000 plant stress response gene expression samples from GEO<sup>1</sup> and SRA<sup>2</sup>. More specifically, 2480 *A.*  
112 *thaliana* (*Arabidopsis thaliana*) array samples, 967 *A. thaliana* RNA-seq samples, 146 *Oryza sativa* array  
113 samples, 172 *Glycine max* array samples, and 104 *Triticum aestivum* array samples were used for space  
114 generation. Each sample is annotated with a label from a stress set. In this study, samples are divided into  
115 Aluminum, Magnesium, Biotic, Cold, Drought, FarRed, FeDeficiency, Genotoxic, Heat, Herbicide, Hormone,  
116 Hypoxia, Light, LowPH, Metabolic, Mutant, Nitrogen, Osmotic, Radiation, Salt, Submergence, UV and  
117 Wounding stress groups. For samples which underwent more than one stress, new labels were generated by  
118 concatenating existing labels from the stress set. For example, 'Biotic.Drought' designates a sample which  
119 sustained both Biotic and Drought stresses.

120 Samples corresponding to each species are normalized in bulk to remove the batch effect. We used robust  
121 multi-array average or RMA [17] for normalizing microarray RAW data files and a pipeline consisting of  
122 Fastq-dump, Trimmomatic [18], Star aligner [19] and featureCounts [20] to derive counts from SRA records.

## 123 2.2 PhysioSpace Method

124 **PhysioSpace** is a supervised dimension reduction method, which aims to extract relevant **physiological**  
125 information from big data sets and store it in a mathematical **space** [8]. The method can be divided into  
126 two main steps: space generation and physio-mapping (Fig.1).

### 127 2.2.1 Space Generation

128 After preparing the data, we derive the physiologically relevant information from normalized data and  
129 store this information in a mathematical space. This step is comparable to *training* in machine learning  
130 terminology. Space generation is done in two stages: space extraction and space trimming. The former  
131 stage is identical to the method described previously in [8]. However, the latter, space trimming, is a novel  
132 addition for adapting the method for studying plant stress response.

133 **Space Extraction** In the PhysioSpace method, all samples are analyzed contrastively, i.e. using differ-  
134 ential expression analysis. "Space" is a matrix which is built upon reference data. In this paper, reference  
135 data contains all Arabidopsis array samples that are measured by the Affymetrix Arabidopsis ATH1 Genome  
136 Array<sup>3</sup>. For each stress group in each data set, gene-wise fold changes are calculated between stressed plants  
137 and their corresponding controls. The fold changes fill one column of the space matrix. This generated ma-  
138 trix, which we call reference space ( $S_r$ ), contains all stress-relevant information represented in the reference  
139 data. In addition to  $S_r$ , we calculated the mean reference space ( $\overline{S_r}$ ). For constructing  $\overline{S_r}$ , for each stress  
140 group, the gene-wise mean value of fold changes in  $S_r$  is calculated and stored in a column in  $\overline{S_r}$ . More  
141 detailed information, as well as a step-by-step guide for creating  $S_r$  and  $\overline{S_r}$ , are provided in supplementary  
142 file 1.

143 **Space Trimming** The stress grouping in this study is done based on the expert annotation provided  
144 alongside public data sets. Therefore, this grouping doesn't necessarily reflect the different classes of biolog-  
145 ical mechanisms that shape the plant response spectrum. There are groups of biologically-related stresses,  
146 which in turn make some stress responses very similar in their full genome signature. Logically, stresses  
147 to which plants respond using the same common mechanisms and pathways, have similar gene expression  
148 fingerprints. On the other hand, stresses have significantly different gene expression patterns when few to  
149 no common genes are involved in their corresponding stress responses.

150 From the mathematical point of view, the distance between distinct stress responses manifests itself in  
151 the collinearity of axes of the extracted space. Collinearity in a mathematical space is a source of redundancy,  
152 and in our application, can result in lower accuracy and robustness.

153 We came up with a new algorithm named space trimming: an unsupervised approach which in combina-  
154 tion with space extraction, makes up a hybrid method that can detect new groups of stress responses. We  
155 call these new-found groups meta-stress groups.

156 Space trimming uses a consecutive combination of hierarchical clustering and leave-one-out cross-validation  
157 (LOOCV) to remove the aforementioned redundancy from a space. Space trimming consists of three steps:

- 158 1. Clustering and cross-validation analyses are done on the space under study, and a dendrogram based  
159 on the calculated similarities is constructed.
- 160 2. Groups of stresses that are close and have low accuracy are combined to make meta-stress groups.  
161 Groups that merge under the 50% of the maximum height in the dendrogram (i.e. groups with the  
162 distance of 50% of the maximum distance or lower) are considered close, and groups of stresses that  
163 mostly have an accuracy of less than 0.7 are considered low in accuracy.
- 164 3. Any newly-generated meta group that has at least the same performance as its subgroups is kept. All  
165 other meta groups are reverted back to their former groups.

<sup>1</sup><https://www.ncbi.nlm.nih.gov/geo/>

<sup>2</sup><https://www.ncbi.nlm.nih.gov/sra/>

<sup>3</sup><https://www.ncbi.nlm.nih.gov/geo/query/acc.cgi?acc=GPL198>

166 We applied the Space trimming algorithm to the reference space  $S_r$ , generated in the last section, from  
 167 Arabidopsis microarray data (Fig.2).

168 In LOOCV, by definition, one sample is left out for testing. In our LOOCV scheme though, we left out  
 169 one GSE (GEO<sup>4</sup> series) data set in each cycle. Due to batch effects, even with proper preprocessing, samples  
 170 from the same GSE set tend to be similar. With leave-one-GSE-out cross-validation, we make sure that the  
 171 stress response from different data sets could be successfully matched together.

172 In each iteration, one GSE data set is chosen as the test set, it is mapped to the rest of the data sets,  
 173 the training set, and it is counted as a successful match if the analyzed test data and its most similar data  
 174 set from training set undergone the same stress group. Using the confusionMatrix function from the caret  
 175 package [21] in R<sup>5</sup>, matching accuracy and robustness of the method is evaluated (Fig.2A). With an overall  
 176 balanced accuracy of 0.43, a Cohen’s kappa of 0.385, and an accuracy  $p$ -value of  $7.35 \times 10^{-42}$ , PhysioSpace  
 177 could successfully match the samples going through the same stress group.

178 As expected, clustering analysis exposed the similarities among different stress responses. For instance,  
 179 responses to Osmotic, Drought and Salt stresses seem to have common underlying activated gene groups. Or  
 180 regarding Biotic, Hormone, and Biotic.Hormone (double stress), their close proximity points toward a very  
 181 similar stress response. They also predominantly have lower accuracy comparable to other stress groups  
 182 (Fig.2A). This led us to the assumption that these groups of stress responses share one or few underlying  
 183 defensive mechanisms, such as an innate immune response.

184 Merging the similar stress groups and constructing the meta-stress groups result in an improved perfor-  
 185 mance of the method (Fig.2B). We constructed three new meta-stress groups: BioMone, which comprises  
 186 of Biotic, Hormone, and Biotic.Hormone stress groups, DrouSaTic, that was built by combining Drought,  
 187 Salt, and Osmotic stresses, and LighUV, which is made by merging Light and UV stresses (Fig.2B). Redoing  
 188 the LOOCV on the new grouped space demonstrates the performance gain, with an accuracy of 0.57 and  
 189 Cohen’s kappa of 0.49, which increased 0.14 and 0.105 respectively in comparison to the classical grouping  
 190 of stresses. And accuracy  $p$ -value stays significant, as it is equal to  $2.91 \times 10^{-39}$ .

191 The resulted space, which we call meta-reference space or  $S_{mr}$ , and its successive mean space which we  
 192 denote by  $\bar{S}_{mr}$ , are the spaces we use as reference throughout the result section.

### 193 2.2.2 Physio-mapping

194 After acquiring a space from known training data, we can map new data from any technology or species  
 195 back into the space and find similarities between the new unknown information and the known training data.  
 196 Physio-mapping is a nonlinear, model-free mapping, designed to take advantage of omics data structures and  
 197 to compensate biases from heterogeneous assessment protocols. Omics are mostly framed in high-feature  
 198 low-sample arrangements. In most cases, the majority of features in these types of data sets are intrinsically  
 199 dominated by noise rather than physiologically informative facts about the samples under study. Results  
 200 commonly acquired by differential expression analysis are great examples of this phenomenon; in most cases  
 201 of differential expression analyses, only a small proportion of features in an omics data set can be found to  
 202 be significantly different, i.e. correlated with circumstances that are being studied.

203 Presuming this assumption, the mapping is done by taking the following steps:

204 1. Either

205 (a) A new space is extracted from the new data. This means that for each gene in each stress case,  
 206 a fold change is calculated by modeling the gene behavior under the respective stress given the  
 207 control. We call this new input space  $S_i$ .

208 (b) For each stress type  $\gamma$ , genes are sorted from the lowest to highest fold change.

209 (c)  $N$  percent lowest and highest genes are selected as  $L_L(\gamma)$  and  $L_H(\gamma)$  for each  $\gamma$ .  $N$  is a user-  
 210 defined parameter. In this paper, it is between 3 to 5 percent.

211 or

212 Differential expression analysis is done on the input data, and for each stress type  $\gamma$ , down- and  
 213 up-regulated gene sets are calculated, which are called  $L_L(\gamma)$  and  $L_H(\gamma)$ , respectively.

214 2. For each axis on the reference space (i.e. each column in  $\bar{S}_{mr}$ ), a statistical test is performed between  
 215  $L_L(\gamma)$  and  $L_H(\gamma)$  gene groups to form the  $PS$  matrix:

$$PS = \begin{bmatrix} ps_{11} & ps_{12} & \dots & ps_{1t} \\ ps_{21} & ps_{22} & \dots & ps_{2t} \\ \vdots & \vdots & \ddots & \vdots \\ ps_{p1} & ps_{p2} & \dots & ps_{pt} \end{bmatrix} \text{ with } ps_{k\gamma} = \text{signed } \log_2(MWW_{p\text{-value}}(s_{L_H(\gamma)k}, s_{L_L(\gamma)k})) \quad (1)$$

216 In equation 1,  $ps_{km}$  is the physio score between the  $m^{th}$  sample and the  $k^{th}$  column of reference space  
 217  $\bar{S}_{mr}$ .  $ps_{km}$  physio score value shows how similar the  $m^{th}$  sample of  $S_i$  is to the  $k^{th}$  column in  $\bar{S}_{mr}$ .  
 218  $MWW_{p\text{-value}}(a, b)$  is a function that calculates the  $p$ -value of a Mann–Whitney–Wilcoxon statistical test

<sup>4</sup><https://www.ncbi.nlm.nih.gov/geo/>

<sup>5</sup><https://www.r-project.org/>

219 (also known as Mann–Whitney U test or Wilcoxon rank-sum test) between a and b.  $s_{L_H(\gamma)k}$  and  $s_{L_L(\gamma)k}$   
220 are the sets of values in  $k^{th}$  column, and  $i \in L_H$  and  $i \in L_L$  rows of  $\overline{S_{mr}}$ , respectively. And  $signed\ log_2(x)$   
221 is  $\begin{cases} -\log_2(x), & \text{if } mean(s_{L_H(\gamma)k}) \geq mean(s_{L_L(\gamma)k}) \\ \log_2(x), & \text{otherwise} \end{cases}$   
222  $PS$  is a physio score matrix, containing similarity values of all input samples to all axes (i.e. columns)  
223 in the reference space.

224 For inter-species mapping, for instance in analyzing new data from *Oryza sativa* using a space gener-  
225 ated from *A. thaliana*, we resorted to orthologous genes. By using the ideal assumption of orthologs to  
226 have identical biological roles in all species, we mapped genes to their orthologs in cases with interspecies  
227 translation.

## 228 3 Results

### 229 3.1 Stress Space Verification by GO Analysis

230 For substantiating the authenticity of stress information collected using our space generation process, we  
231 utilized the gene list analysis section of PANTHER [22, 23]. For each stress group in our generated mean  
232 meta-stress space  $\overline{S_{mr}}$ , we selected the genes with an absolute score value of more than one and a half<sup>6</sup>,  
233 and tested this gene list by PANTHER overrepresentation Test, against Gene Ontology (GO) biological  
234 processes (Fig.3 and supplement files 2 and 3). From 15 different stress groups, 11 were found to have the  
235 GO terms corresponding to the same stress enriched, with significant corrected  $p$ -values of less than 0.001.

### 236 3.2 Inter-Technology Translation

237 Next generation sequencing (NGS) has revolutionized the biological sciences. Its speed, cost and data  
238 quality outpaced the older DNA-microarray technology, which is why NGS became the standard method to  
239 study transcriptomes. Yet, microarrays were used for RNA quantification for decades. The vast microarray  
240 backlogs have the potential to grant an invaluable resource for new biological studies. Unfortunately, the  
241 measurement technology has an inevitable impact on the transcript measurement levels and the distribution  
242 of the resulting data.

243 Data derived from different platforms are distinctly different. Hence, there are numerous methods to  
244 translate measurements from one technology to another [24, 25]. Moreover, with the third generation se-  
245 quencing right around the corner (PacBio and Nanopore, to name a few [26]), there is a high demand for  
246 computational methods capable of transferring useful information between different measurement technolo-  
247 gies.

248 Since PhysioSpace utilizes the differential expression relations of the genes and not absolute values for  
249 space generation and mapping, it can translate between each and any technology, as long as there exists a  
250 proper method for detecting the differentially expressed genes in the mentioned technology. As proof for  
251 this claim, we mapped more than 900 RNA-seq samples into the microarray space  $S_{mr}$  (Table 1). Our  
252 method can map the same stress type from microarray to RNA-seq data with 78 percent accuracy. We  
253 also calculated the probability of acquiring this accuracy by chance, by randomly permuting the sample  
254 labels and calculating the random accuracy. The performance of our method is significantly higher than any  
255 random accuracy we acquired<sup>7</sup>, with a  $p$ -value of less than  $10^{-7}$ .

### 256 3.3 Inter-Species Translation

257 Although not agriculturally relevant, Arabidopsis is arguably the most investigated species in plant sciences.  
258 Its availability, compact size, and fast growth made it an ideal model species. Nevertheless, there are  
259 significant differences between the Arabidopsis plant model and crop plants, necessitating procedures for  
260 converting well-studied physiological knowledge, e.g. regarding plant response to different types of stress,  
261 from Arabidopsis to crops. In this section, we show how Plant PhysioSpace can be utilized for this purpose.

262 We chose three of the most commercially relevant crops to study: *Oryza sativa* (rice), *Glycine max*  
263 (soybean) and *Triticum aestivum* (wheat). For each crop, more than 100 microarray samples of stress  
264 response experiments were curated, normalized, preprocessed and mapped to the Arabidopsis space  $S_{mr}$ . For  
265 *Oryza sativa* and *Glycine max*, Plant PhysioSpace achieved respective accuracies of 59 and 57 percent, both of  
266 which were significantly higher than any accuracy earned by chance. On the other hand, translation of stress  
267 response from *Triticum aestivum* DNA array data to *A. thaliana*, with an accuracy of 23 percent and a  $p$ -  
268 value of 0.015, was not successful (Table 1). In section 3.5 of this paper, we provided a thorough investigation  
269 into wheat to Arabidopsis translation, hypothesized and examined the reason behind the translation failure,  
270 and provided solutions for fixing it.

<sup>6</sup>For BioMone and FeDeficiency stresses with cutoff of 1.5, less than 10 genes were selected, which is too small of a set for list enrichment analysis. Hence in these two cases, cutoff is reduced to one.

<sup>7</sup>The highest acquired accuracy from 10,000,000 random runs for RNA2DNA translation was 52% (minimum = 12.08%, first quartile = 28.12%, median = 30.87%, third quartile = 33.56% and maximum = 52.35%).

| Method               |                 | RNA-seq to DNA-array,<br>both <i>A. thaliana</i> | Rice to <i>A. thaliana</i> ,<br>both DNA-array | Soybean to <i>A. thaliana</i> ,<br>both DNA-array | Wheat to <i>A. thaliana</i> ,<br>both DNA-array |
|----------------------|-----------------|--------------------------------------------------|------------------------------------------------|---------------------------------------------------|-------------------------------------------------|
| Plant PhysioSpace    | Accuracy        | 0.78                                             | 0.59                                           | 0.57                                              | 0.23                                            |
|                      | <i>p</i> -value | $< 10^{-7}$                                      | $3 \times 10^{-7}$                             | 0.002                                             | 0.015                                           |
| GSEA                 | Accuracy        | 0.68                                             | 0.30                                           | 0.10                                              | 0.06                                            |
|                      | <i>p</i> -value | $< 10^{-7}$                                      | $3 \times 10^{-4}$                             | 0.42                                              | 0.97                                            |
| WTCS                 | Accuracy        | 0.69                                             | 0.57                                           | 0.12                                              | 0.13                                            |
|                      | <i>p</i> -value | $< 10^{-7}$                                      | $< 10^{-7}$                                    | 0.21                                              | 0.28                                            |
| Pearson correlation  | Accuracy        | 0.73                                             | 0.48                                           | 0.32                                              | 0.14                                            |
|                      | <i>p</i> -value | $< 10^{-7}$                                      | $< 10^{-7}$                                    | 0.12                                              | 0.17                                            |
| Spearman correlation | Accuracy        | 0.62                                             | 0.49                                           | 0.29                                              | 0.27                                            |
|                      | <i>p</i> -value | $< 10^{-7}$                                      | $< 10^{-7}$                                    | 0.21                                              | $4.79 \times 10^{-5}$                           |
| Euclidean distance   | Accuracy        | 0.30                                             | 0.27                                           | 0.21                                              | 0.39                                            |
|                      | <i>p</i> -value | 0.83                                             | 0.03                                           | 0.62                                              | $< 10^{-7}$                                     |

**Table 1: Stress translation between platforms and Species.** In each column, the best performer is marked in red.

### 271 3.4 Benchmarking Plant PhysioSpace against Other Methods

272 We used the results from inter-technology and -species stress response translation to benchmark our method.  
 273 Plant PhysioSpace is compared to the most common approaches used in bioinformatics for measuring rela-  
 274 tions between two or more gene expression samples: Gene Set Enrichment Analysis (GSEA) [27], Weighted  
 275 Connectivity Score (WTCS), which is an advanced version of GSEA used in connectivity map [28], Pearson  
 276 and Spearman correlations, and Euclidean distance. For each method, fold change values of samples, from  
 277 different technologies and species, are calculated and used for finding the similarities between samples. Based  
 278 on our results in inter-species and -platform mapping, Plant PhysioSpace could outperform other methods  
 279 in all scenarios, except in mapping from wheat to Arabidopsis (Table 1).

### 280 3.5 In Depth Investigation of Wheat Stress Response

281 The poor performance of our method in translating stress response from *Triticum aestivum* to *A. thaliana*  
 282 may have potentially derived from the microarray used to measure the wheat gene expressions. All microar-  
 283 ray samples of *Triticum aestivum* in this study are generated by using Affymetrix Wheat Genome Array<sup>8</sup>.  
 284 Not only the aged technology could potentially deter the accuracy of transcription measurements, but also  
 285 as a polyploid, the complex genetics of wheat would make the task of measuring its RNA levels troublesome.  
 286 Fortunately, advances in NGS gave rise to wheat stress response data sets with higher precision. In this  
 287 section, we repeated the wheat-to-Arabidopsis translation from inter-species analysis, except with wheat  
 288 RNA-seq instead of microarray data.

289 We turned to the Wheat Expression Browser [29, 30] as the source of *Triticum aestivum* RNA-seq data.  
 290 From this source, we queried all data sets which study stress response, contain more than 30 samples, and  
 291 include controls. We mapped these data sets into mean meta-reference space  $\overline{S}_{mr}$ , and plotted Physio scores  
 292 of three stress groups with the highest values (Fig.4).

293 In the experiment set ERP013829, wheat response after inoculation with fungal pathogen *Fusarium*  
 294 *graminearum* is measured through time [31]. For this experiment, Plant PhysioSpace correctly predicts that  
 295 wheat is experiencing BioMone (Biotic and Hormone) stress. In addition, the diachronic rise in the response  
 296 indicates how Physio scores are quantitatively comparable (Fig.4A).

297 In the data set ERP013983, responses of two different mutants of wheat are studied to wheat yellow  
 298 rust pathogen *Puccinia striiformis f.sp. tritici* (PST). The authors focused on the pathogen suppression of  
 299 basal defense in plants [32]. From their results, they deduced the pathogen overcame the defense by rapidly  
 300 suppressing the genes involved in chitin perception on day 2 after inoculation. In the susceptible interaction,  
 301 this provides the possibility of invasion and colonization, while in resistant plants, this suppression is quickly  
 302 reverted. Plant PhysioSpace results expose this mechanism correctly: Both plant types are inducing a  
 303 BioMone response on day 1, followed by a suppression of the plant defense response on day 2. Eventually,

<sup>8</sup><https://www.ncbi.nlm.nih.gov/geo/query/acc.cgi?acc=GPL3802>

304 the quick resurgence of intense BioMone response in resistant wheat helps it in withstanding PST, while the  
305 reaction of the susceptible trait might be too slow to deflect the pathogen (Fig.4B).

306 Plants in ERP009837 went through the infection cycle of the hemibiotrophic fungus *Zymoseptoria tritici*.  
307 Similar to ERP013829, plants respond to the pathogen with a dominant BioMone response (Fig.4C). Al-  
308 though unlike ERP013829, in which the experiment spanned a few hours, in ERP009837 plants were studied  
309 for a longer period. Physio scores suggest that wheat responds to the presence of the pathogen by increasing  
310 its BioMone response. This response starts to degrade from day 14, which is in alignment with the original  
311 publication of the data set [33], in which the authors state that on day 21, plant tissue is completely defeated.

312 In SRP048912, the responses of two different traits of resistant and susceptible wheat to *Fusarium crown*  
313 rot are studied [34]. Only two different time points are included in this experiment: 3 and 5 days after  
314 inoculation (dai). Plant PhysioSpace results correctly suggest the most dominant stress response present in  
315 plants is BioMone, with the resistant wheat having a stronger response than the susceptible (Fig.4D).

316 Among the Wheat data sets we analyzed in this section, ERP003465 is arguably the most complex, and  
317 consequently most interesting as a testing scenario for our method. ERP003465 examined the behavior of  
318 5 different genotypes under the disease pressure of *Fusarium graminearum* [35]. Two well-validated and  
319 highly reproducible QTLs (quantitative trait loci), *Fhb1* and *Qfhs.ifa-5A*, are studied from samples taken  
320 30 and 50 hours after inoculation (hai). Five different genotypes were investigated: CM-82036, a progeny  
321 of the resistant Sumai-3, and four near-isogenic lines (NILs) bearing either, both, or none of the resistant  
322 alleles *Fhb1* and *Qfhs*. Among the four, NIL1 is a mutant with both QTLs, expected to have the highest  
323 resistance after CM-82036, NIL2 and NIL3 are mutants harboring *Fhb1* and *Qfhs* QTLs respectively, with  
324 both predicted to behave moderately resistant, and NIL4 missing both QTLs, and is likely to be susceptible.

325 Data analysis in the original paper was mainly based on differential expression analysis. As a first  
326 step, the total number of differentially expressed genes for each genotype at each time point was taken as  
327 a surrogate for stress response intensity to *Fusarium graminearum*. In the next steps, the weighted gene  
328 co-expression network analysis (WGCNA) was used to detect clusters of genes with similar patterns, and  
329 Gene Ontology analysis was utilized to infer the role of each cluster in the stress response.

330 Being able to quantify the intensity of each stress type at each time point, Plant PhysioSpace can  
331 provide much more insight into the characteristics and dynamics of the stress responses that are at play in  
332 the ERP003465 experiment (Fig.4E). As this data set encompasses a high number of samples distributed  
333 between only two time points, we plotted the results as a bar graph. And because the results cover a wide  
334 range of values for this experiment, we used log-scaled PhysioScores in the graph, and replaced values smaller  
335 than one by one (i.e. zero in log-scale).

336 Among the concluding remarks in the original paper, some are in concordance with the results from our  
337 method. For example, lines lacking *Qfhs.ifa-5A* are regarded as “slow responders” by the original authors,  
338 since they lack resistance against initial infection inferred by *Qfhs.ifa-5A*. This lack of early response can be  
339 seen in our results (Fig.4E): lines lacking *Qfhs.ifa-5A*, i.e. NIL2 and NIL4, have no BioMone (Biotic and  
340 Hormone) stress response at the early time point, while NIL1 and NIL3 show a considerable BioMone stress  
341 response at the same time point. Another remark from the original paper suggested that a lack of timely  
342 defensive reaction could result in a higher infection in a later time, and consequently stronger response,  
343 and vice versa: a quick response may reduce the intensity and infection at a later time. This can be seen  
344 in the contrasting response dynamics of NIL1 versus the other lines (Fig.4E). NIL1 possesses both QTLs:  
345 *Qfhs.ifa-5A* ensures an early and fast stress response, evident on 30 hai time point. And a strong follow up,  
346 courtesy of *Fhb1*, results in a non-existent BioMone response at 50 hai. NIL3 contains *Qfhs.ifa-5A*, so it  
347 benefits from a quick response at 30 hai, but due to the absence of *Fhb1*, it cannot be rid of infection at 50  
348 hai, evident by the high BioMone response at that time point. As mentioned, lines NIL2 and NIL4, which  
349 lack *Qfhs.ifa-5A*, do not have an early response and have to play catch up with other lines on the later time  
350 point.

351 Although many conclusions that could be derived from our method are similar to the ones from the  
352 original publication, there are some discrepancies between the two groups as well. For instance, in most  
353 samples, Wounding stress response is not only present, but it is even stronger than BioMone response in  
354 some cases. This is in contrast with the original paper, in which it is mentioned that inoculation was done  
355 cautiously without wounding the tissue. Interpretation of CM-82036 defensive behavior is another point of  
356 difference between our method and the results from the original paper. Kugler et al. construed the high  
357 number of differentially expressed genes (DEG) at 30 hai as a sign of strong early response for CM-82036,  
358 even stronger than NIL1 and NIL3. They followed up by studying specific gene families that are relevant to  
359 defense mechanisms, such as UGTs and WRKYs, and showed more DEGs from these families can be found  
360 at 30 hai in CM-82036 versus other lines. This finding is different from what we can interpret using our  
361 method: Although CM-82036 exhibits BioMone response at 30 hai, the magnitude is somewhere between  
362 fast responder lines, that is NIL1 and NIL3, and slow responders, i.e. NIL2 and NIL4.

363 We speculate the main reason for the aforementioned inconsistencies is the particular way the prepro-  
364 cessing was done in the original paper. In their preprocessing, Kugler et al. mapped the reads to a list of  
365 barley high confidence genes and only used the reads with a possible match. This step drastically reduces  
366 the number of analyzed transcripts, and also discards wheat-specific genes with no barley homologs. Our  
367 method is designed for high-dimensional data, preferably data from the whole genome, therefore the specific  
368 preprocessing of this data set might have reduced the performance of Plant PhysioSpace. We should also

369 mention that stress responses are not mutually exclusive; A plant can display multiple different responses  
370 at the same time, some of which may even share part of their biological pathways. *Fusarium graminearum*  
371 could have damage plant tissue at some point, which explains the existence of wounding response alongside  
372 BioMone.

373 Albeit the mediocre results of the last experiment, in this section we showed how, in 4 out of 5 data sets,  
374 Plant PhysioSpace could:

- 375 1. correctly identify the type of stress plants are going through.
- 376 2. accurately relate the response from RNA-seq test data to DNA-array trained models.
- 377 3. rightly translate *T. aestivum* stress response to *A. thaliana*.

### 378 **3.6 Plant PhysioSpace Application in Single Cell Analysis**

379 Single cell technologies facilitate investigating transcription profiles in single cell resolution, in order to  
380 perceive the genetic basis of each cell type and its function. Although relatively new, more and more plant  
381 single cell data sets are becoming available to the community [9, 10, 11, 12, 13]. For now, most sequence  
382 data sets are focused on Arabidopsis roots. They try to gain an in-depth understanding of transcription  
383 patterns of different cells in different developmental stages of wild-type non-stressed plant roots. To our  
384 knowledge, the only publication in which stressed single cells were sequenced is the paper by Jean-Baptiste  
385 et al. [12]. In this work, 38°C heat stress was applied to 8-day-old seedlings for 45 minutes. Subsequently,  
386 roots of the seedlings were harvested, along with the roots of age- and time-matched control seedlings. The  
387 authors could capture and sequence 1,009 cells from the stressed group and 1076 from the control group.  
388 For processing the sequencing results, they followed the usual single cell analysis pipeline: PCA, UMAP  
389 and clustering, followed by differential gene expression analysis on clusters and enrichment tests on genes  
390 related to heat-shock. The results show the "promise and challenges inherent in comparing single cell data  
391 across different conditions and treatments". In this section, we demonstrate how a dedicated method, such  
392 as Plant PhysioSpace, can bring forth more benefits than using the methodological norms.

393 To analyze the single cell data set, we used the gene-wise mean value of all control cells as the reference,  
394 calculated fold changes for each single cell, and fed those fold change values into the Plant PhysioSpace  
395 pipeline (Fig.5). Regardless of the cell type, heat-stressed single cells had significantly higher heat stress  
396 scores, compared to control single cells (Fig.5A). For studying the heat-induced cell type disparity, we overlaid  
397 heat stress scores on UMAP and tSNE plots (Fig.5B&5C). In both tSNE and UMAP plots, coordinate values  
398 calculated in the original paper of Jean-Baptiste et al. were used. As a result, cells are bundled in cell type  
399 clusters in the UMAP plot, while in the tSNE plot, cells are clearly separated into two big clusters of control  
400 and stressed. Although, inside these two big clusters, sub-clusters of different cell types are evident (Fig.S1).  
401 On the UMAP plot on the other hand, big clusters represent cell types (Fig.S2), and inside each cell type  
402 cluster, groups of control and stressed cells may or may not be distinct, depending on the cell type. For  
403 example, in Hair and Non-hair clusters, control and heated cells are separated, while the separation is less  
404 pronounced in Stele cells (Fig.S2).

405 To look into the distinct behavior of different cells under stress, we also plotted cell heat scores grouped  
406 by the corresponding cell types (Fig.5D&S3). The results show how Hair and Non-hair cells have higher  
407 heat scores, which demonstrates how the outer layers of roots are sharper in their response to heat. This  
408 finding is in concordance with one of the conclusions in the original paper, in which based on the behavior  
409 of the heat-relevant genes, they concluded the three outermost cell layers of the root went through higher  
410 levels of changes caused by the heat stress. The authors hypothesized this may be because of more direct  
411 exposure of the outer layers to the heat shock, resulting in a quicker and stronger response.

412 Although resulting in generally the same conclusions, in this analysis Plant PhysioSpace provided an  
413 advantageous experience for the end-user, through providing:

- 414 1. convenience: unlike the original paper, there was no need for search and curation of heat stress gene  
415 clusters, as they are already available in Plant PhysioSpace, as well as clusters for other common  
416 stresses.
- 417 2. precision: not only the stress type but also the magnitude of the stress response could be quantified by  
418 our method, something which is lacking in traditional gene list enrichment approaches. For example,  
419 Plant PhysioSpace results suggest a stronger response in Hair response, compared to Non-hair response  
420 (Fig.5D). This inference could not be concluded by the results of traditional methods.
- 421 3. optimization: in one run, our tool calculated responses of 20 different stresses for 2085 single cells, in  
422 less than 3 minutes on a 2-core laptop CPU. This swift performance is accomplished by precalculating  
423 the stress space, in combination with an optimized mapping algorithm, all of which is readily available  
424 for the community to use.

### 425 **3.7 Availability**

426 To provide the community with an easy-to-use implementation of our method, we built Plant PhysioSpace  
427 into two different R packages: a method package (<https://git.rwth-aachen.de/jrc-combine/PhysioSpaceMethods>)



428 containing functions for generating new spaces and Physio-mapping, and a data package ([https://git.rwth-](https://git.rwth-aachen.de/jrc-combine/PlantPhysioSpace)  
429 [aachen.de/jrc-combine/PlantPhysioSpace](https://git.rwth-aachen.de/jrc-combine/PlantPhysioSpace)) comprising plant stress spaces such as  $\overline{S_{mr}}$  and  $\overline{S_r}$  that were used  
430 in this paper.

431 In addition, we made a shiny<sup>9</sup> web application of Plant PhysioSpace (Fig.6). We hosted the web app on  
432 shinyapp.io (<http://physiospace.shinyapps.io/plant/>), to be freely available to use (under the terms of GPL-3  
433 license). We also built a docker image of the ready-to-use tool ([https://github.com/usadellab/physiospace\\_shiny](https://github.com/usadellab/physiospace_shiny)).

## 434 4 Discussion

435 Gaining proper insight into stress response mechanisms in plants is not only a must for the future of  
436 agricultural research, but will prompt advances in the plant research field in general. In this study, we  
437 developed an advanced computational method, designed to aid in understanding stress response in plants.  
438 The lightweight algorithm allows it to run on either personal computers, or as a web application, making it  
439 an ideal tool for experimental quality control, data set annotation, to draw conclusions considering thousands  
440 of genes, et cetera.

441 We built the new method upon a previously published method in humans, called PhysioSpace. We  
442 achieved this conformity by curating a multitude of Arabidopsis stress response samples to have a rich  
443 training data set, adapting the space generation algorithm, i.e. training, to acclimate to the specific char-  
444 acteristics of stress response data in plants, and thoroughly testing against other species and types of data.  
445 The results of this study demonstrated that Plant PhysioSpace can be a convenient and practical tool for  
446 analyzing new stress response data sets, to apprehend, contrast to state of the art, or to simply quality  
447 control.

448 Notably, our tool could perform adequately even when it was mapping information between different  
449 platforms and species. Although, it is crucial to bear in mind these cross translations necessitate for some  
450 conditions to be true. In cross-platform translation, it was assumed that with the same experimental setup  
451 and samples, there are computational pipelines available which roughly compute the same differentially  
452 expressed gene lists regardless of the platform used. And in cross-species mapping, we assumed orthologous  
453 genes have the same biological function across all species; evidently impossible to be consistently true for all  
454 genes, but a sizable portion of genes have to pass this criterion for the inter-species translation to work.

455 We demonstrated how Plant Physiospace can provide insights when used for analyzing single cell data  
456 sets. Recent advances in single cell technology call for suitable bioinformatic analysis tools, for example for  
457 reducing the interfering technical noise [16]. The clear, factual results derived from single cell data analysis  
458 in this paper bring a spectrum of applications to mind for the future, especially in the light of approaching  
459 plant single cell atlas projects [36, 37].

460 To our knowledge, Plant PhysioSpace is the only computational tool available capable of quantizing  
461 stress response in plant cells. Therefore, it can be used to assess each cell under stress, to grasp an under-  
462 standing of the complex responses and interplay of cells in plants under stress, and to achieve a comprehensive  
463 characterization of plant response to stress as a whole.

## 464 5 Data Availability Statement

465 All the scripts that generate the results of this paper can be found in [https://git.rwth-aachen.de/jrc-](https://git.rwth-aachen.de/jrc-combine/PlantPhysioSpacePaper)  
466 [combine/PlantPhysioSpacePaper](https://git.rwth-aachen.de/jrc-combine/PlantPhysioSpacePaper).

## 467 References

- 468 [1] Kenneth S Chester. The problem of acquired physiological immunity in plants. *The Quarterly Review*  
469 *of Biology*, 8(3):275–324, 1933.
- 470 [2] Joseph Kuć. Translocated signals for plant immunization a. *Annals of the New York Academy of*  
471 *Sciences*, 494(1):221–223, 1987.
- 472 [3] Uwe Conrath, Gerold JM Beckers, Caspar JG Langenbach, and Michal R Jaskiewicz. Priming for  
473 enhanced defense. *Annual review of phytopathology*, 53:97–119, 2015.
- 474 [4] Asis Datta. Genetic engineering for improving quality and productivity of crops. *Agriculture & Food*  
475 *Security*, 2(1):1–3, 2013.
- 476 [5] Ayushi Kamthan, Mohan Kamthan, Mohammad Azam, Niranjan Chakraborty, Subhra Chakraborty,  
477 and Asis Datta. Expression of a fungal sterol desaturase improves tomato drought tolerance, pathogen  
478 resistance and nutritional quality. *Scientific reports*, 2:951, 2012.

---

<sup>9</sup><http://shiny.rstudio.com>

- 479 [6] Ayushi Kamthan, Mohan Kamthan, Niranjana Chakraborty, Subhra Chakraborty, and Asis Datta. A  
480 simple protocol for extraction, derivatization, and analysis of tomato leaf and fruit lipophilic metabolites  
481 using gc-ms. *Protocol Exchange*, 10, 2012.
- 482 [7] Dennis Gonsalves. Control of papaya ringspot virus in papaya: a case study. *Annual review of phy-*  
483 *topathology*, 36(1):415–437, 1998.
- 484 [8] Michael Lenz, Bernhard M Schuldt, Franz-Josef Müller, and Andreas Schuppert. Physiospace: relating  
485 gene expression experiments from heterogeneous sources using shared physiological processes. *PLoS*  
486 *One*, 8(10):e77627, 2013.
- 487 [9] Christine N Shulse, Benjamin J Cole, Doina Ciobanu, Junyan Lin, Yuko Yoshinaga, Mona Gouran,  
488 Gina M Turco, Yiwen Zhu, Ronan C O’Malley, Siobhan M Brady, et al. High-throughput single-cell  
489 transcriptome profiling of plant cell types. *Cell reports*, 27(7):2241–2247, 2019.
- 490 [10] Tom Denyer, Xiaoli Ma, Simon Klesen, Emanuele Scacchi, Kay Nieselt, and Marja CP Timmer-  
491 mans. Spatiotemporal developmental trajectories in the arabidopsis root revealed using high-throughput  
492 single-cell rna sequencing. *Developmental cell*, 48(6):840–852, 2019.
- 493 [11] Kook Hui Ryu, Ling Huang, Hyun Min Kang, and John Schiefelbein. Single-cell rna sequencing resolves  
494 molecular relationships among individual plant cells. *Plant physiology*, 179(4):1444–1456, 2019.
- 495 [12] Ken Jean-Baptiste, José L McFaline-Figueroa, Cristina M Alexandre, Michael W Dorrity, Lauren Saun-  
496 ders, Kerry L Bubb, Cole Trapnell, Stanley Fields, Christine Queitsch, and Josh T Cuperus. Dynamics  
497 of gene expression in single root cells of arabidopsis thaliana. *The Plant Cell*, 31(5):993–1011, 2019.
- 498 [13] Tian-Qi Zhang, Zhou-Geng Xu, Guan-Dong Shang, and Jia-Wei Wang. A single-cell rna sequencing  
499 profiles the developmental landscape of arabidopsis root. *Molecular plant*, 12(5):648–660, 2019.
- 500 [14] Andrew Butler, Paul Hoffman, Peter Smibert, Efthymia Papalexi, and Rahul Satija. Integrating single-  
501 cell transcriptomic data across different conditions, technologies, and species. *Nature biotechnology*,  
502 36(5):411–420, 2018.
- 503 [15] Cole Trapnell, Davide Cacchiarelli, Jonna Grimsby, Prapti Pokharel, Shuqiang Li, Michael Morse,  
504 Niall J Lennon, Kenneth J Livak, Tarjei S Mikkelsen, and John L Rinn. The dynamics and regulators  
505 of cell fate decisions are revealed by pseudotemporal ordering of single cells. *Nature biotechnology*,  
506 32(4):381, 2014.
- 507 [16] Charlotte Rich-Griffin, Annika Stechemesser, Jessica Finch, Emma Lucas, Sascha Ott, and Patrick  
508 Schäfer. Single-cell transcriptomics: a high-resolution avenue for plant functional genomics. *Trends in*  
509 *plant science*, 25(2):186–197, 2020.
- 510 [17] Rafael A Irizarry, Bridget Hobbs, Francois Collin, Yasmin D Beazer-Barclay, Kristen J Antonellis, Uwe  
511 Scherf, and Terence P Speed. Exploration, normalization, and summaries of high density oligonucleotide  
512 array probe level data. *Biostatistics*, 4(2):249–264, 2003.
- 513 [18] Anthony M Bolger, Marc Lohse, and Bjoern Usadel. Trimmomatic: a flexible trimmer for illumina  
514 sequence data. *Bioinformatics*, 30(15):2114–2120, 2014.
- 515 [19] Alexander Dobin, Carrie A Davis, Felix Schlesinger, Jorg Drenkow, Chris Zaleski, Sonali Jha, Philippe  
516 Batut, Mark Chaisson, and Thomas R Gingeras. Star: ultrafast universal rna-seq aligner. *Bioinfor-*  
517 *matics*, 29(1):15–21, 2013.
- 518 [20] Yang Liao, Gordon K Smyth, and Wei Shi. featurecounts: an efficient general purpose program for  
519 assigning sequence reads to genomic features. *Bioinformatics*, 30(7):923–930, 2014.
- 520 [21] Max Kuhn. *caret: Classification and Regression Training*, 2020. R package version 6.0-86.
- 521 [22] Huaiyu Mi, Anushya Muruganujan, Dustin Ebert, Xiaosong Huang, and Paul D Thomas. Panther  
522 version 14: more genomes, a new panther go-slim and improvements in enrichment analysis tools.  
523 *Nucleic acids research*, 47(D1):D419–D426, 2019.
- 524 [23] Paul D Thomas, Anish Kejariwal, Nan Guo, Huaiyu Mi, Michael J Campbell, Anushya Muruganujan,  
525 and Betty Lazareva-Ulitsky. Applications for protein sequence–function evolution data: mrna/protein  
526 expression analysis and coding snp scoring tools. *Nucleic acids research*, 34(suppl\_2):W645–W650, 2006.
- 527 [24] Matthew E Ritchie, Belinda Phipson, DI Wu, Yifang Hu, Charity W Law, Wei Shi, and Gordon K  
528 Smyth. limma powers differential expression analyses for rna-sequencing and microarray studies. *Nucleic*  
529 *acids research*, 43(7):e47–e47, 2015.

- 530 [25] Michael I Love, Wolfgang Huber, and Simon Anders. Moderated estimation of fold change and dispersion for  
531 rna-seq data with *deseq2*. *Genome biology*, 15(12):550, 2014.
- 532 [26] Thomas P Niedringhaus, Denitsa Milanova, Matthew B Kerby, Michael P Snyder, and Annelise E  
533 Barron. Landscape of next-generation sequencing technologies. *Analytical chemistry*, 83(12):4327–4341,  
534 2011.
- 535 [27] Justin Lamb, Emily D Crawford, David Peck, Joshua W Modell, Irene C Blat, Matthew J Wrobel,  
536 Jim Lerner, Jean-Philippe Brunet, Aravind Subramanian, Kenneth N Ross, et al. The connectiv-  
537 ity map: using gene-expression signatures to connect small molecules, genes, and disease. *science*,  
538 313(5795):1929–1935, 2006.
- 539 [28] Aravind Subramanian, Rajiv Narayan, Steven M Corsello, David D Peck, Ted E Natoli, Xiaodong Lu,  
540 Joshua Gould, John F Davis, Andrew A Tubelli, Jacob K Asiedu, et al. A next generation connectivity  
541 map: L1000 platform and the first 1,000,000 profiles. *Cell*, 171(6):1437–1452, 2017.
- 542 [29] Philippa Borrill, Ricardo Ramirez-Gonzalez, and Cristobal Uauy. expvip: a customizable rna-seq data  
543 analysis and visualization platform. *Plant physiology*, 170(4):2172–2186, 2016.
- 544 [30] R Ramírez-González, P Borrill, D Lang, SA Harrington, J Brinton, L Venturini, et al. The transcrip-  
545 tional landscape of hexaploid wheat across tissues and cultivars. *Science*, 361(6403):eaar6089, 2018.
- 546 [31] W Schweiger, B Steiner, Sonia Vautrin, Thomas Nussbaumer, Gerald Siegwart, Mina Zamini, F Jun-  
547 greithmeier, Verena Gratl, Marc Lemmens, KFX Mayer, et al. Suppressed recombination and unique  
548 candidate genes in the divergent haplotype encoding *fhb1*, a major fusarium head blight resistance locus  
549 in wheat. *Theoretical and Applied Genetics*, 129(8):1607–1623, 2016.
- 550 [32] Albor Dobon, Daniel CE Bunting, Luis Enrique Cabrera-Quio, Cristobal Uauy, and Diane GO Saunders.  
551 The host-pathogen interaction between wheat and yellow rust induces temporally coordinated waves of  
552 gene expression. *BMC genomics*, 17(1):1–14, 2016.
- 553 [33] Jason J Rudd, Kostya Kanyuka, Keywan Hassani-Pak, Mark Derbyshire, Ambrose Andongabo, Jean  
554 Devonshire, Artem Lysenko, Mansoor Saqi, Nalini M Desai, Stephen J Powers, et al. Transcriptome and  
555 metabolite profiling of the infection cycle of zymoseptoria tritici on wheat reveals a biphasic interaction  
556 with plant immunity involving differential pathogen chromosomal contributions and a variation on the  
557 hemibiotrophic lifestyle definition. *Plant physiology*, 167(3):1158–1185, 2015.
- 558 [34] Jian Ma, Jiri Stiller, Qiang Zhao, Qi Feng, Colin Cavanagh, Penghao Wang, Donald Gardiner, Frédéric  
559 Choulet, Catherine Feuillet, You-Liang Zheng, et al. Transcriptome and allele specificity associated  
560 with a 3bl locus for fusarium crown rot resistance in bread wheat. *PLoS One*, 9(11):e113309, 2014.
- 561 [35] Karl G Kugler, Gerald Siegwart, Thomas Nussbaumer, Christian Ametz, Manuel Spannagl, Barbara  
562 Steiner, Marc Lemmens, Klaus FX Mayer, Hermann Buerstmayr, and Wolfgang Schweiger. Quantitative  
563 trait loci-dependent analysis of a gene co-expression network associated with fusarium head blight  
564 resistance in bread wheat (*triticum aestivum*l.). *BMC genomics*, 14(1):728, 2013.
- 565 [36] Seung Y Rhee, Kenneth D Birnbaum, and David W Ehrhardt. Towards building a plant cell atlas.  
566 *Trends in plant science*, 24(4):303–310, 2019.
- 567 [37] Robert Petryszak, Maria Keays, Y Amy Tang, Nuno A Fonseca, Elisabet Barrera, Tony Burdett,  
568 Anja Füllgrabe, Alfonso Munoz-Pomer Fuentes, Simon Jupp, Satu Koskinen, et al. Expression atlas  
569 update—an integrated database of gene and protein expression in humans, animals and plants. *Nucleic  
570 acids research*, 44(D1):D746–D752, 2016.
- 571 [38] Wencke Walter, Fátima Sánchez-Cabo, and Mercedes Ricote. Goplot: an r package for visually com-  
572 bining expression data with functional analysis. *Bioinformatics*, 31(17):2912–2914, 2015.

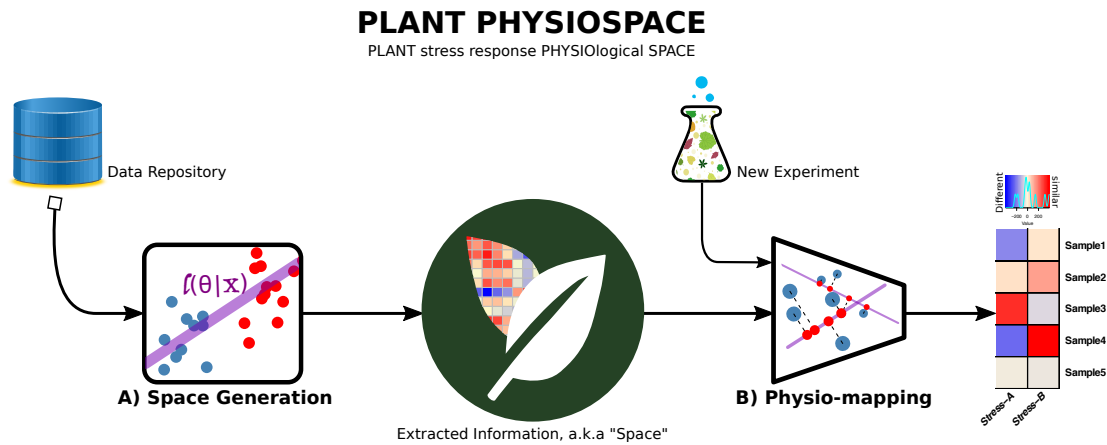

**Figure 1: Plant PhysioSpace Overview.** The method consists of two main sections: space generation and Physio-mapping. In space generation (A), data from public repositories is processed and its information is extracted. After trimming, the extracted information is stored in matrices called “space”, representing physiology-relevant expression patterns. Physio-mapping (B) uses a space to analyze new, unknown data, for example from a new experiment. The new data is mapped to the generated space, resulting in “similarity” scores that indicate the likeness of the new data to the known physiological processes.

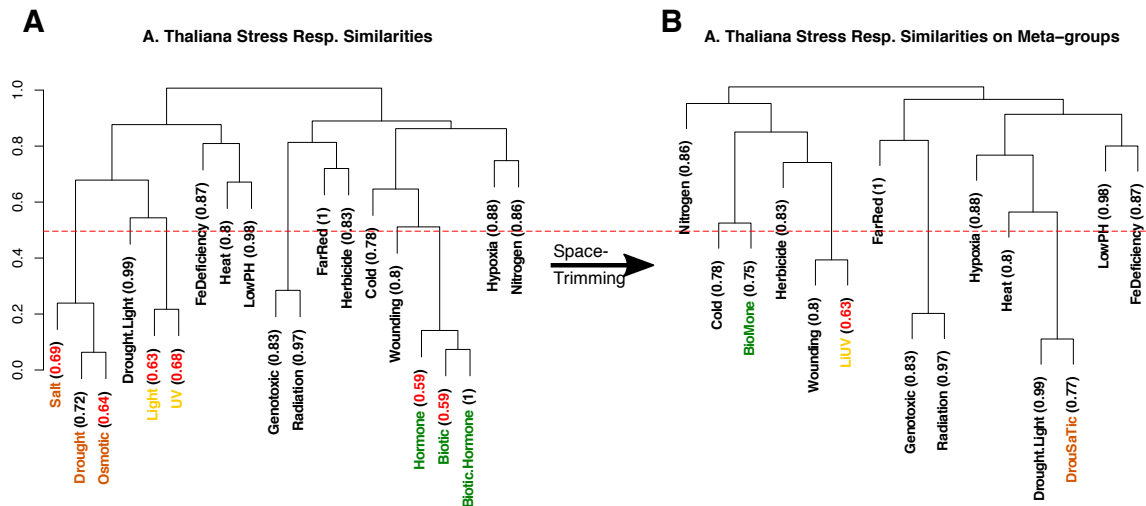

**Figure 2: Space Trimming.** Stress groups are clustered and for each group, leave-one-out cross-validation accuracy is calculated, written in parenthesis, as shown in panel A. Close groups with low accuracy, written in red, are combined to form new stress groups, called meta-groups, as shown in panel B. Groups are considered close if they merge in the dendrogram in a height lower than 0.5 (50% of maximum height). This cut-off height is shown in the figure with a dashed red line. In this figure, Salt, Drought and Osmotic stress groups, marked with brown color, merge into DrouSaTic meta-group, Hormone, Biotic and Biotic.Hormone groups form BioMone meta-group, written in green, and Light and UV groups combine into LiUV, shown in yellow.

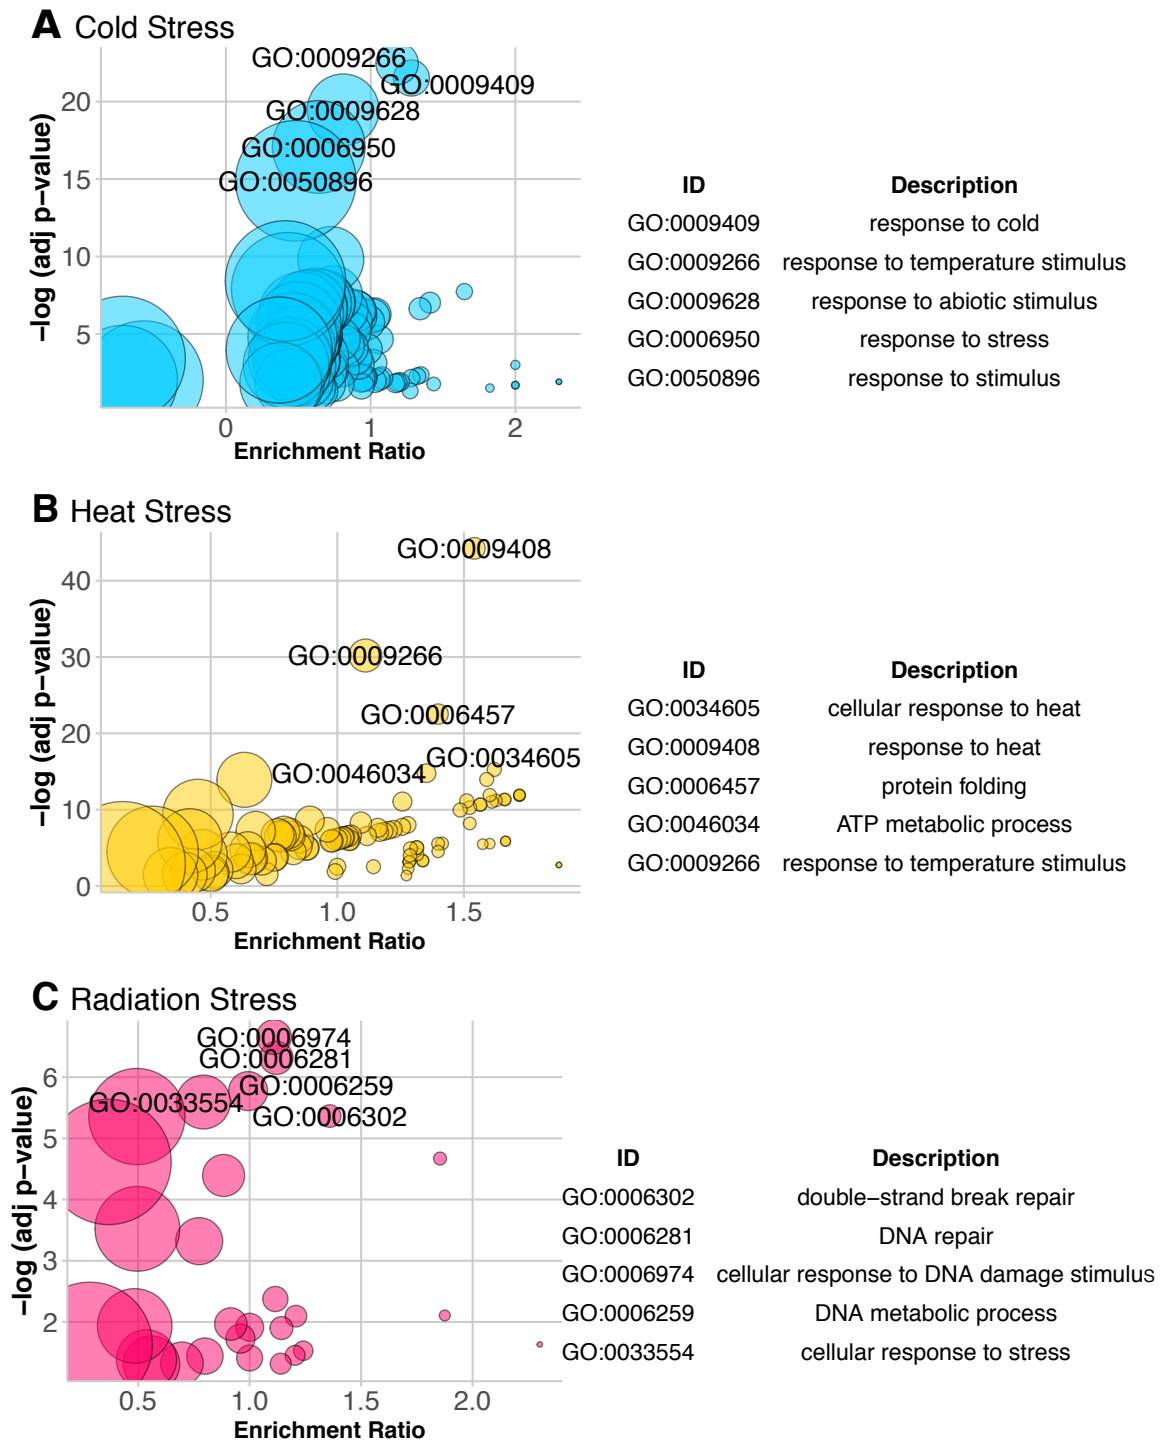

**Figure 3: GO Analysis of Mean Stress Space.** Results of GO analysis on three stress groups are demonstrated using bubble plots. In the plots, each enriched GO term is represented by a circle, with adjusted  $p$ -values as y-axis and enrichment ratio as x-axis. The size of the circle shows the size of the gene list of the corresponding GO term. And enrichment ratio here means the ratio between the actual number of differentially expressed genes and the expected, in each GO group. For each plot, 5 most significant GO terms are labeled on the plot and listed in a table beside each plot. Complete set of bubble plot and set of significant GO terms for all 15 stress groups are provided in supplement files 2 and 3. Plots were generated using the GOplot package in R [38].

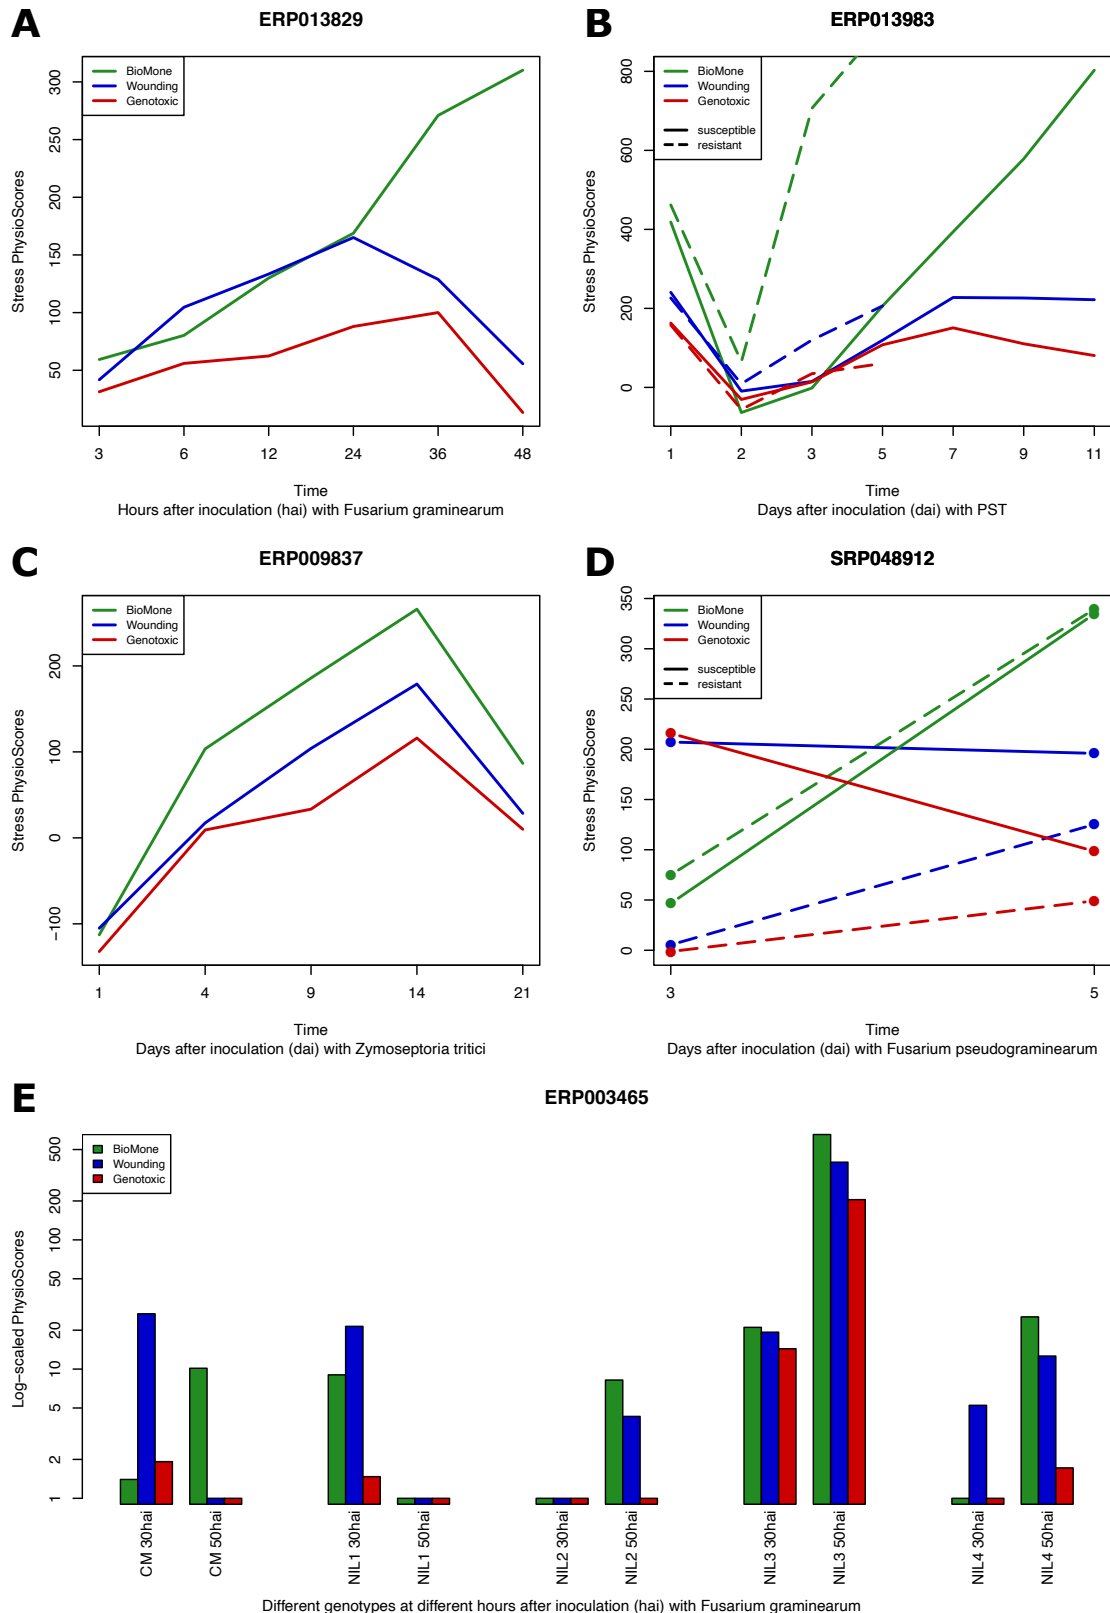

**Figure 4: Time Series Analysis of Biotic Stress Response of Wheat RNA-seq data.** 5 different biotic-stressed data sets from Wheat Expression Browser are mapped to the Arabidopsis space  $S_{mr}$ , and the three groups with highest stress values are plotted for each data set. In 4 out of 5 cases, BioMone (Biotic and Hormone) stress group has the highest similarity value, with resistant mutants having higher responses than the susceptible ones (panels A, B, C, and D).

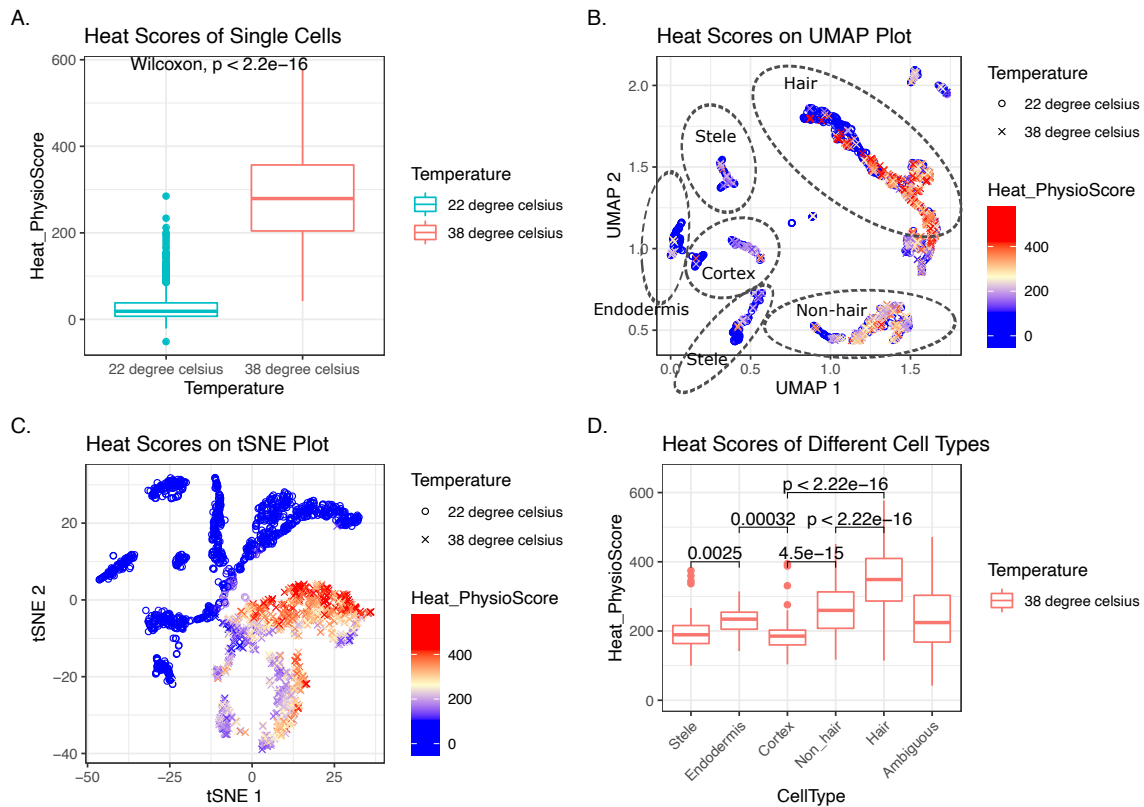

**Figure 5: Single Cell Analysis Results of Plant PhysioSpace.** Stress scores were calculated for each cell. For demonstrating the outcome, we plotted the heat score of the two big groups of control and stressed, shown in panel A. This box plot proves how Plant PhysioSpace could correctly detect and quantify stress response in single cell data. On panels B and C, we overlaid the heat scores on UMAP and tSNE plots, respectively. On panel D, boxplot of heat scores, on y-axis, were plotted against different cell types, on x-axis. Cell types on the x-axis are ordered based on the morphological anatomy, starting from inner cell types to outermost cell layers (excluding Ambiguous cells, which come at the end).

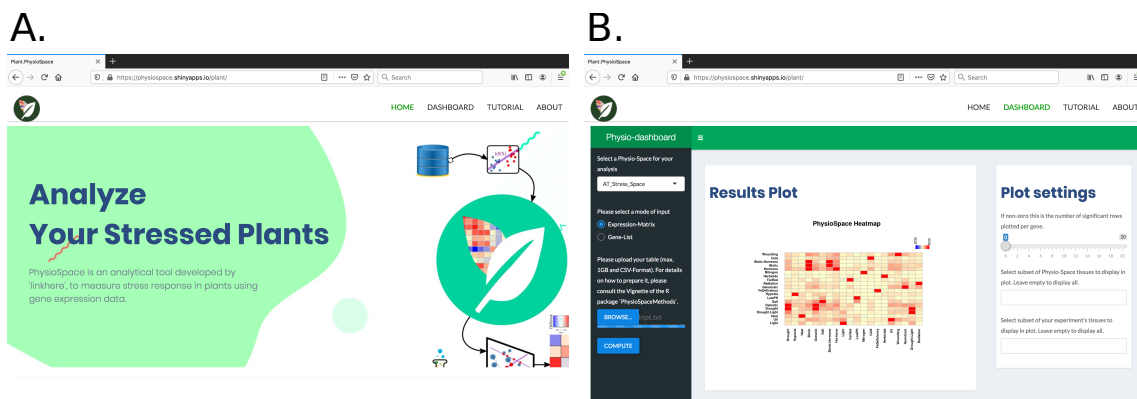

**Figure 6: Plant PhysioSpace Web-application**
